# Supplementary material for: 3D printing of cellulose/leaf-like zeolitic imidazolate frameworks (CelloZIF-L) for adsorption of carbon dioxide (CO2) and heavy metal ions
Source: Royal Society of Chemistry journal article supplement (doi:10.1039/d2dt04168e), 2023-01-01
Supplement: d2dt04168e1.pdf [file d2dt04168e1.pdf]

### 3D Printing of Cellulose/Leaf-like Zeolitic Imidazolate Frameworks (CelloZIF-L) for Adsorption of Carbon dioxide (CO<sub>2</sub>) and Heavy Metal Ions

Hani Nasser Abdelhamid<sup>1,2,3\*</sup>, Sahar Sultan<sup>1</sup>, Aji P. Mathew<sup>1\*</sup>

<sup>1</sup>Division of Materials and Environmental Chemistry, Stockholm University, Svante Arrhenius väg 16 C, Stockholm, SE-10691, Sweden

<sup>2</sup>Advanced Multifunctional Materials Laboratory, Department of Chemistry, Faculty of Science, Assiut University, Assiut, 71515, Egypt

<sup>3</sup>Nanotechnology Research Centre (NTRC), The British University in Egypt (BUE), El-Shorouk City, Suez Desert Road, P.O. Box 43, Cairo 11837, Egypt

\*Corresponding to Abdelhamid ([hany.abdelhamid@aun.edu.eg](mailto:hany.abdelhamid@aun.edu.eg)); Mathew ([aji.mathew@mmk.su.se](mailto:aji.mathew@mmk.su.se))

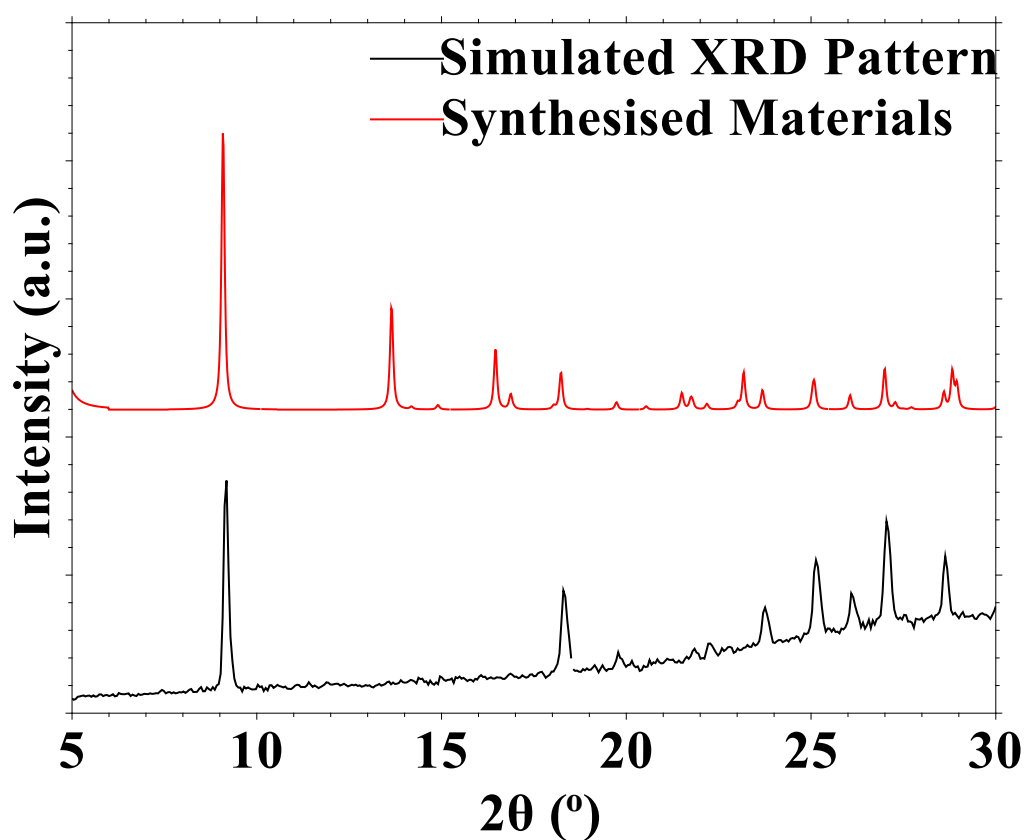

Figure S1 XRD pattern for Zinc hydroxyl nitrate and simulated pattern.

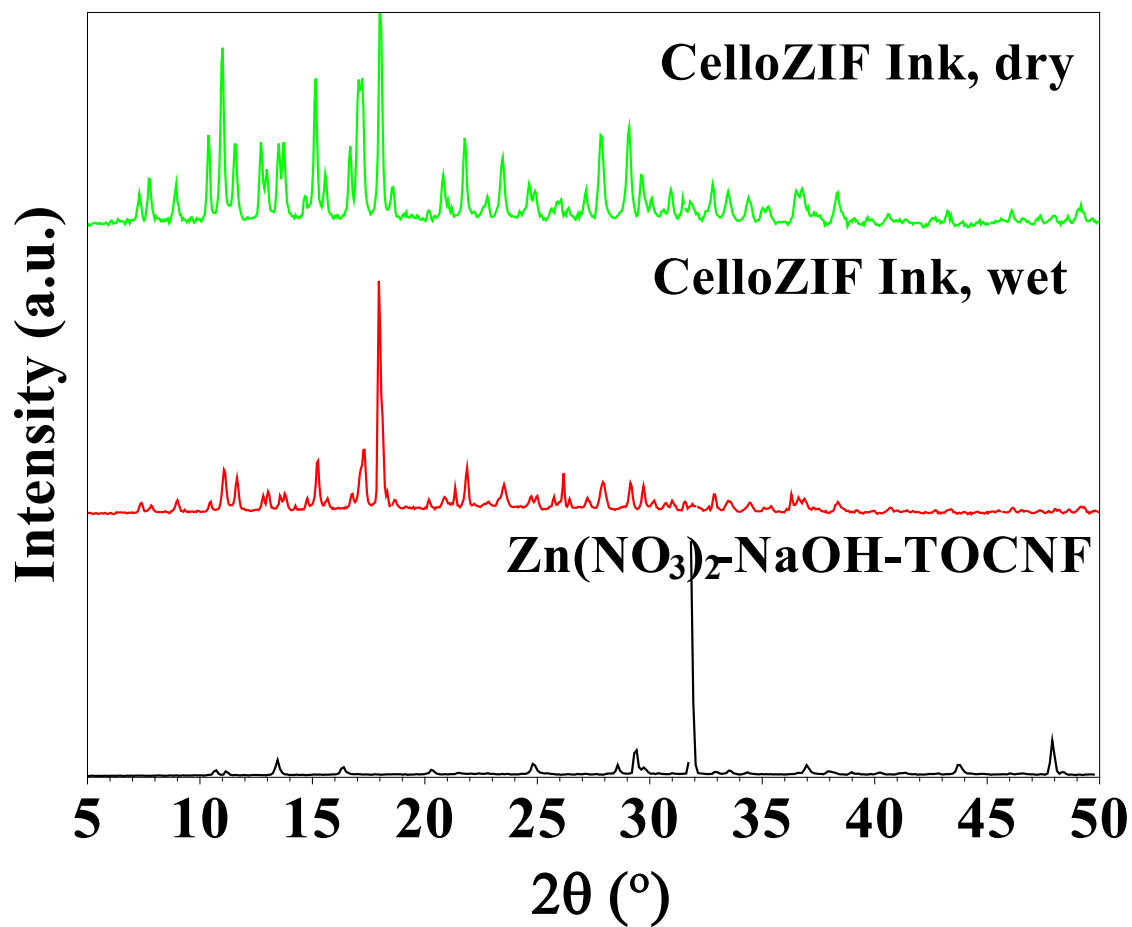

**Figure S2** XRD patterns for  $\text{Zn}(\text{NO}_3)_2/\text{NaOH}/\text{TOCNF}$  and CelloZIF-L ink in wet and dry forms.

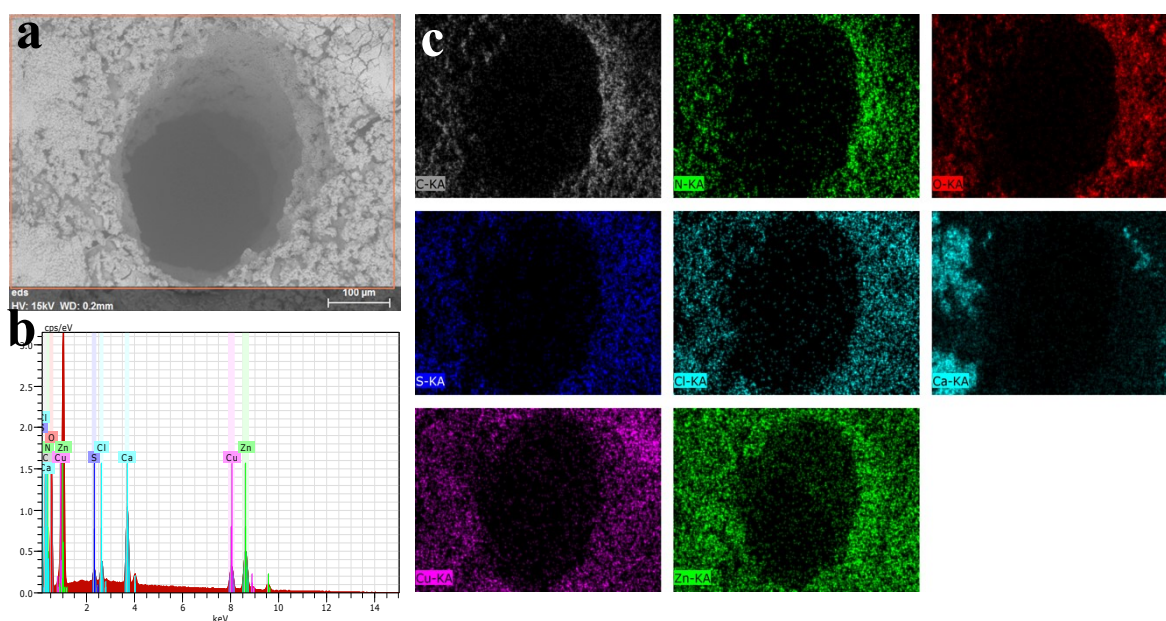

**Figure S3** a) SEM image, b) EDX analysis, and c) EDX mapping for  $\text{Cu}^{2+}$  (5 ppm) adsorbed into 3D CelloZIF-L\_Cubs.

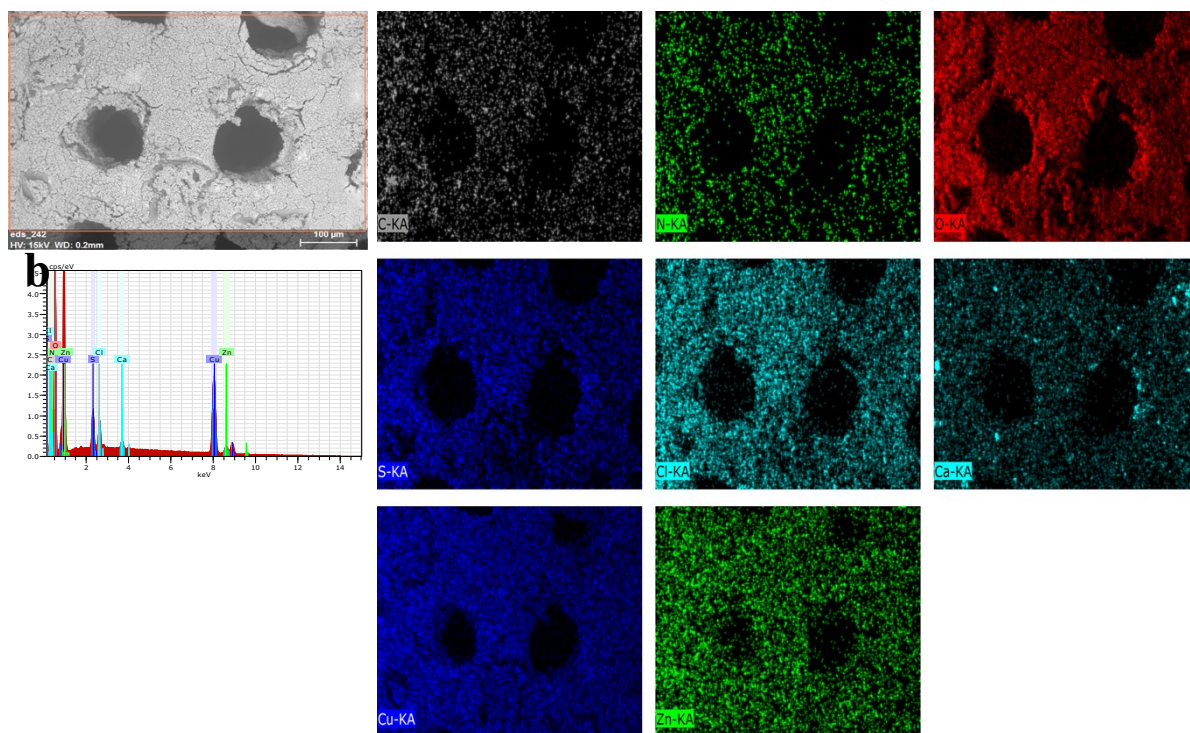

**Figure S4** a) SEM image, b) EDX analysis, and c) EDX mapping for  $\text{Cu}^{2+}$  (10 ppm) adsorbed into 3D CelloZIF-L\_Cubs.

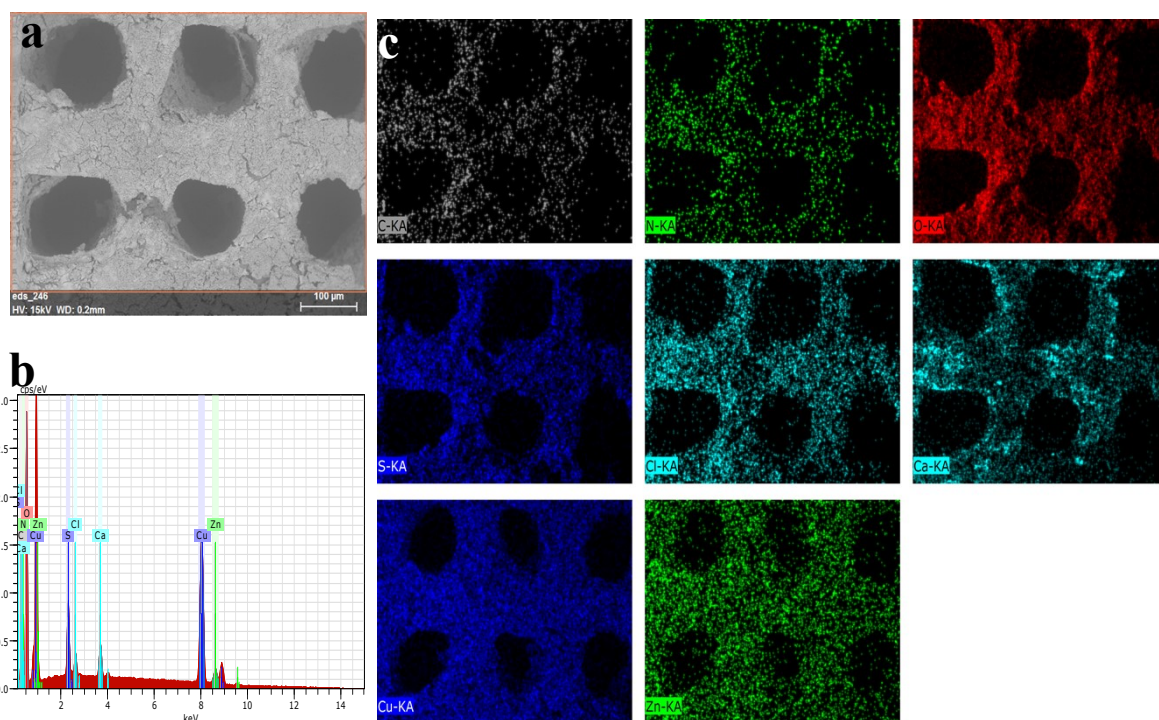

**Figure S5** a) SEM image, b) EDX analysis, and c) EDX mapping for  $\text{Cu}^{2+}$  (50 ppm) adsorbed into 3D CelloZIF-L\_Cubs.



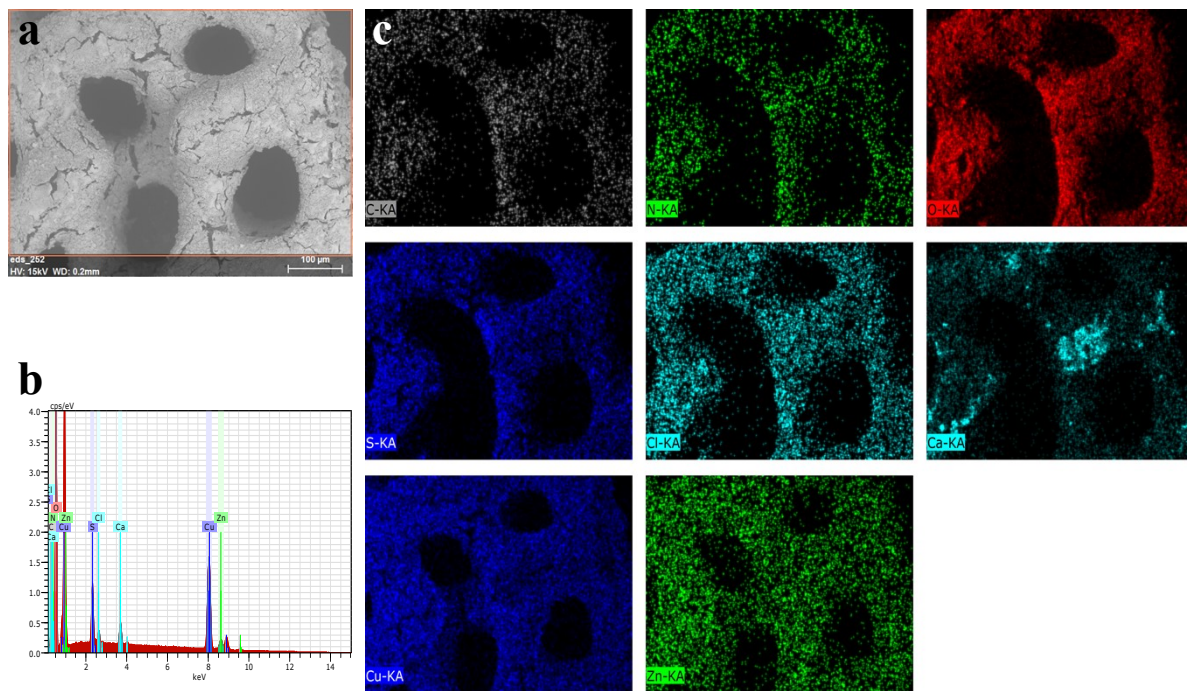

**Figure S6** a) SEM image, b) EDX analysis, and c) EDX mapping for  $\text{Cu}^{2+}$  (100 ppm) adsorbed into 3D CelloZIF-L\_Cubs.
